# Supplementary material
Source: publisher figshare collection journal article supplement (https://acs.figshare.com/ndownloader/files/13007933)
Supplement: Supplementary file 1 [file 13007933]

**Supporting Information for**

**Hybrid Poly(Ionic Liquid) Membranes with In-Situ Grown Layered Double Hydroxide and Preserved Liquid Crystal Morphology for Hydroxide Transport**

*Na Sun, Xinpei Gao\*, Fei Lu, Panpan Sun, Aoli Wu and Liqiang Zheng\**

Key Laboratory of Colloid and Interface Chemistry, Shandong University, Ministry of Education, Jinan, 250100, P. R. China.

\*Corresponding author: Liqiang Zheng E-mail address: lqzheng@sdu.edu.cn

Xinpei Gao E-mail address: gaoxinpei@mail.sdu.edu.cn

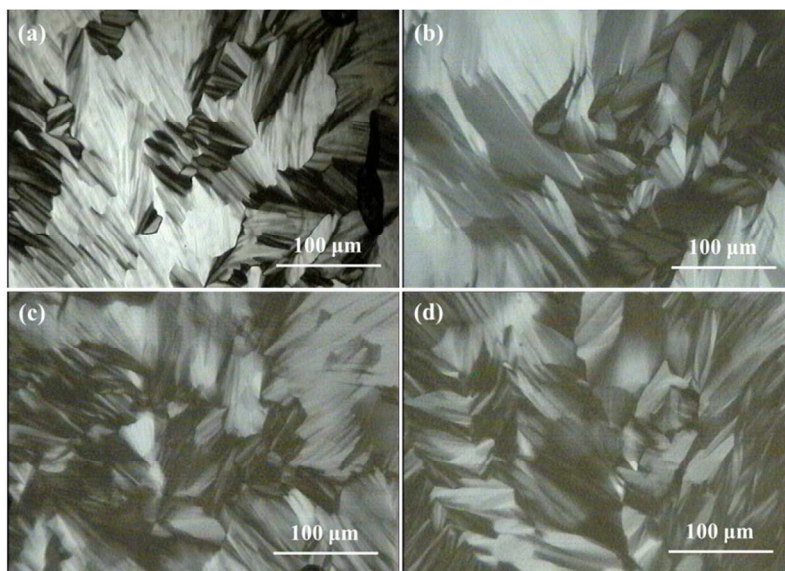

**Figure S1.** POM images of C<sub>12</sub>VIMCl aqueous mixture with different concentration of salts: 0 M (a), 0.12 M (b), 0.24 M (c), and 0.36 M (d).

**Table S1.** Structure parameters for the  $H_1$  phase of  $C_{12}VIMCl$  aqueous mixture.

| Salt concentration<br>(mol/L) | $[C_{12}VIM][Cl]$<br>(wt%) | $a_0$<br>(nm) | $\Phi_L$ | $d_H$<br>(nm) | $d_w$<br>(nm) |
|-------------------------------|----------------------------|---------------|----------|---------------|---------------|
| 0                             | 60%                        | 4.076         | 0.583    | 1.635         | 0.806         |
|                               | 70%                        | 3.904         | 0.685    | 1.697         | 0.509         |
|                               | 80%                        | 3.759         | 0.789    | 1.753         | 0.252         |
| 0.12                          | 60%                        | 4.121         | 0.585    | 1.656         | 0.809         |
|                               | 70%                        | 3.945         | 0.687    | 1.717         | 0.510         |
|                               | 80%                        | 3.784         | 0.790    | 1.766         | 0.251         |
| 0.24                          | 60%                        | 4.121         | 0.587    | 1.658         | 0.804         |
|                               | 70%                        | 3.945         | 0.689    | 1.719         | 0.506         |
|                               | 80%                        | 3.784         | 0.791    | 1.768         | 0.248         |
| 0.36                          | 60%                        | 4.121         | 0.589    | 1.661         | 0.798         |
|                               | 70%                        | 3.945         | 0.691    | 1.722         | 0.502         |
|                               | 80%                        | 3.784         | 0.793    | 1.770         | 0.245         |

$\Phi_L$  is the volume fraction of hydrophobic alkyl chain in the surfactant molecular.  $a_0$  is the lattice parameter.  $d_H$  is the radius of cylinder unit in the  $H_1$  phase.  $d_w$  is the thickness of water channel in the LC phase.

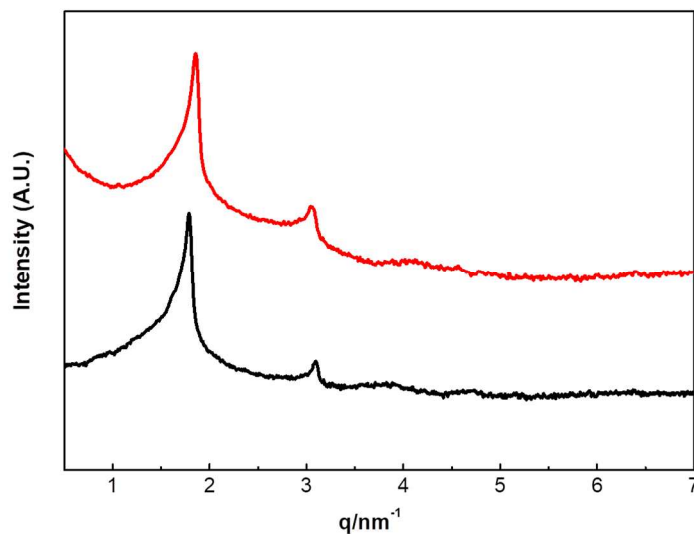

**Figure S2.** SAXS patterns of LC samples with 70%  $C_{12}VIMCl$  in 0.36 M salt solution (black) and after coprecipitation for 96 h (red).

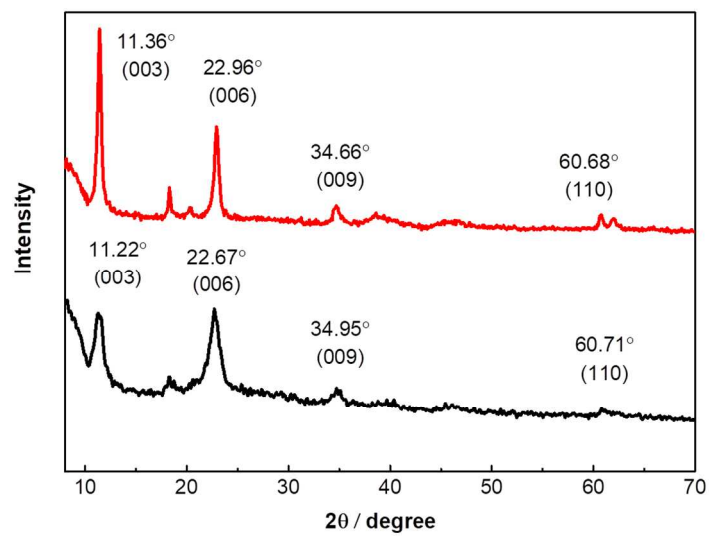

**Figure S3.** XRD patterns of LDHs synthesized in hexagonal LC with 0.36 M salt solution (black) and synthesized from coprecipitation in solution without LC template (red).

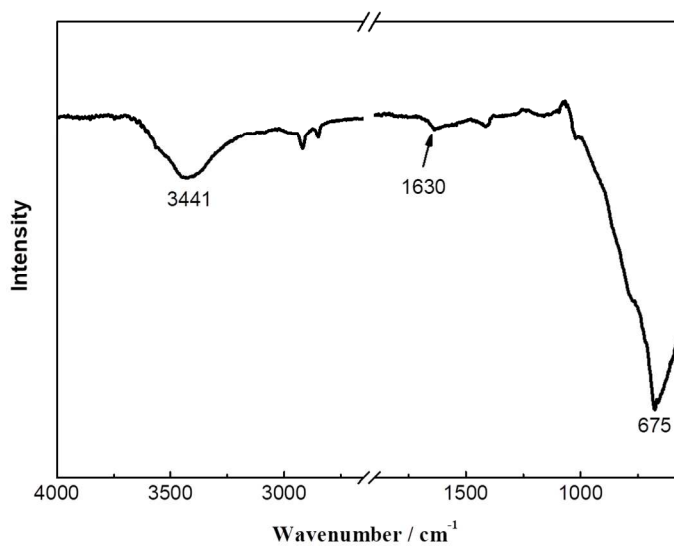

**Figure S4.** FT-IR spectrum of LDH synthesized in hexagonal LC with 0.36 M salt solution.

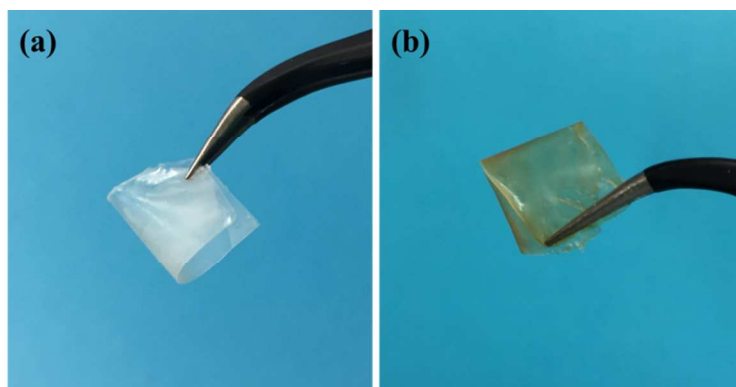

**Figure S5.** The photograph of the membrane: (a) in  $\text{Cl}^-$  form; (b) in  $\text{OH}^-$  form.

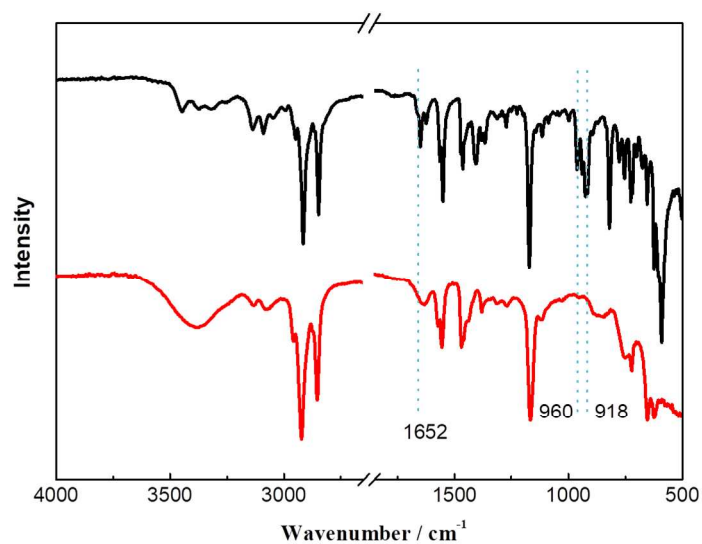

**Figure S6.** Comparative FT-IR spectra of the LC sample (black) and the polymerized LC membrane (red).

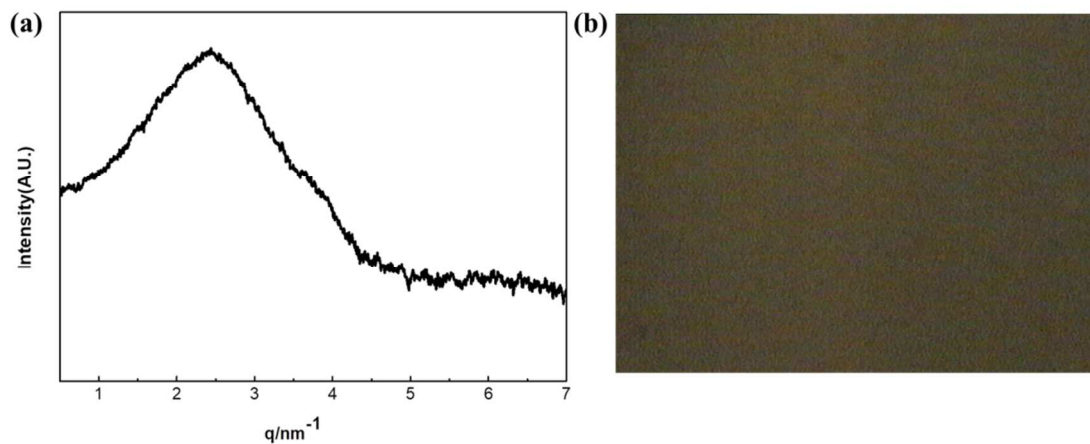

**Figure S7.** SAXS pattern (a) and POM image (b) of the AEM obtained by in-phase photopolymerization of 70%  $\text{C}_{12}\text{VIMCl}$  ethanol solution (AEM-ethanol-70%).

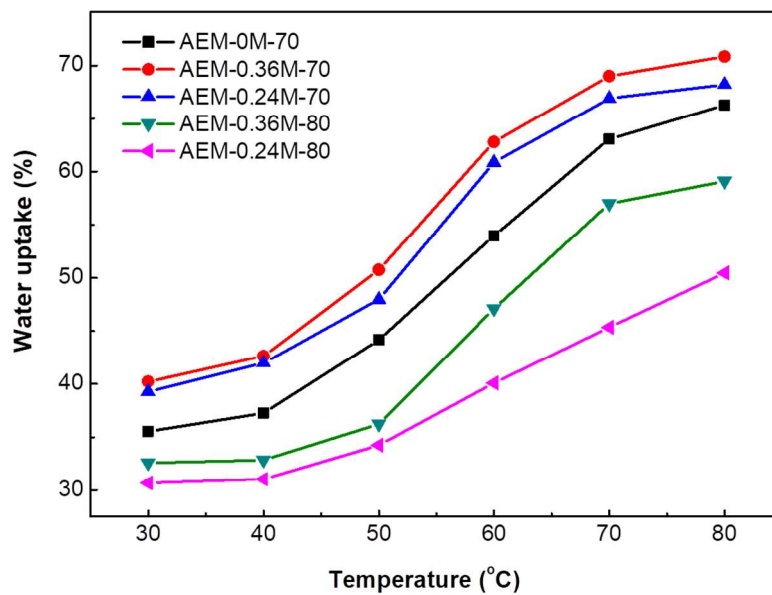

**Figure S8.** The water uptake of the membranes in  $\text{OH}^-$  form at varied temperatures.

**Table S2.** Water uptake (WU), swelling degree (SD), and conductivities of recently reported AEMs. In each referenced paper, we choose the AEMs with similar IEC values for comparison with our results.

| IEC<br>(mmol/g) | WU<br>(%) | SD<br>(%) | Conductivity<br>(mS/cm) | Ref       |
|-----------------|-----------|-----------|-------------------------|-----------|
| 2.13            | 22.1      | 10.6      | 49.79 (80°C)            | This work |
| 2.61            | 107.2     | N         | 82 (80°C)               | 1         |
| 2.16            | 109       | N         | 89.0 (80°C)             | 2         |
| 1.95            | 145       | 30.5      | 55.0 (80°C)             | 3         |
| 1.76            | 43.7      | 7.1       | 13.2 (60°C)             | 4         |
| 2.24            | 51        | 30        | 70.2 (80°C)             | 5         |
| 2.27            | 87.3      | 19        | 33.2 (60°C)             | 6         |
| 1.92            | 95        | 51        | 41 (60°C)               | 7         |
| 2.07            | 47        | 13.5      | 68 (80°C)               | 8         |
| 2.0             | 55        | N         | 60 (70°C)               | 9         |

(1) Kim, Y.; Moh, L. C. H.; Swager, T. M. Anion Exchange Membranes: Enhancement by Addition of Unfunctionalized Triptycene Poly(Ether Sulfone)s. *ACS Appl. Mater. Interfaces* **2017**, *9*, 42409-42414.

(2) Olsson, J. S.; Pham, T. H.; Jannasch, P. Poly(Arylene Piperidinium) Hydroxide Ion Exchange Membranes: Synthesis, Alkaline Stability, and Conductivity. *Adv. Funct. Mater.* **2017**, 1702758.

(3) Zhu, Y.; He, Y.; Ge, X.; Liang, X.; Shehzad, M. A.; Hu, M.; Liu, Y.; Wu, L.; Xu, T. A Benzyltetramethylimidazolium-Based Membrane with Exceptional Alkaline Stability in Fuel Cells: Role of Its Structure in Alkaline Stability. *J. Mater. Chem. A* **2018**, *6*, 527-534.

(4) Wang, X.; Wang, P.; Sun, Y.; Wang, J.; Fang, H.; Yang, S.; Wei, H.; Ding, Y. A Mechanically Strong and Tough Anion Exchange Membrane Engineered with Non-covalent Modalities. *Chem. Commun.* **2017**, *53*, 12369-12372.

- (5) Chen, N.; Liu, Y.; Long, C.; Li, R.; Wang, F.; Zhu, H. Enhanced Performance of Ionic-Liquid-Coated Silica/Quaternized Poly(2,6-Dimethyl-1,4-Phenylene Oxide) Composite Membrane for Anion Exchange Membrane Fuel Cells. *Electrochim. Acta* **2017**, 258, 124-133.
- (6) Ouadaa, A.; Xu, H.; Luo, T.; Gao, S.; Wang, X.; Fang, Z.; Jing, C.; Zhu, C. A Series of Poly(Butylimidazolium) Ionic Liquid Functionalized Copolymers for Anion Exchange Membranes. *J. Power Sources* **2017**, 371, 77-85.
- (7) Ponce-González, J.; Ouachan, I.; Varcoe, J. R.; Whelligan, D. K. Radiation-Induced Grafting of a Butyl-Spacer Styrenic Monomer onto ETFE: the Synthesis of the Most Alkali Stable Radiation-Grafted Anion-Exchange Membrane to Date. *J. Mater. Chem. A* **2018**, 6, 823-827.
- (8) Dong, X.; Lv, D.; Zheng, J.; Xue, B.; Bi, W.; Li, S.; Zhang, S. Pyrrolidinium-Functionalized Poly(Arylene Ether Sulfone)s for Anion Exchange Membranes: Using Densely Concentrated Ionic Groups and Block Design to Improve Membrane Performance. *J. Membr. Sci.* **2017**, 535, 301-311.
- (9) Kim, E.; Lee, S.; Woo, S.; Park, S.-H.; Yim, S.-D.; Shin, D.; Bae, B. Synthesis and Characterization of Anion Exchange Multi-Block Copolymer Membranes with a Fluorine Moiety as Alkaline Membrane Fuel Cells. *J. Power Sources* **2017**, 359, 568-576.

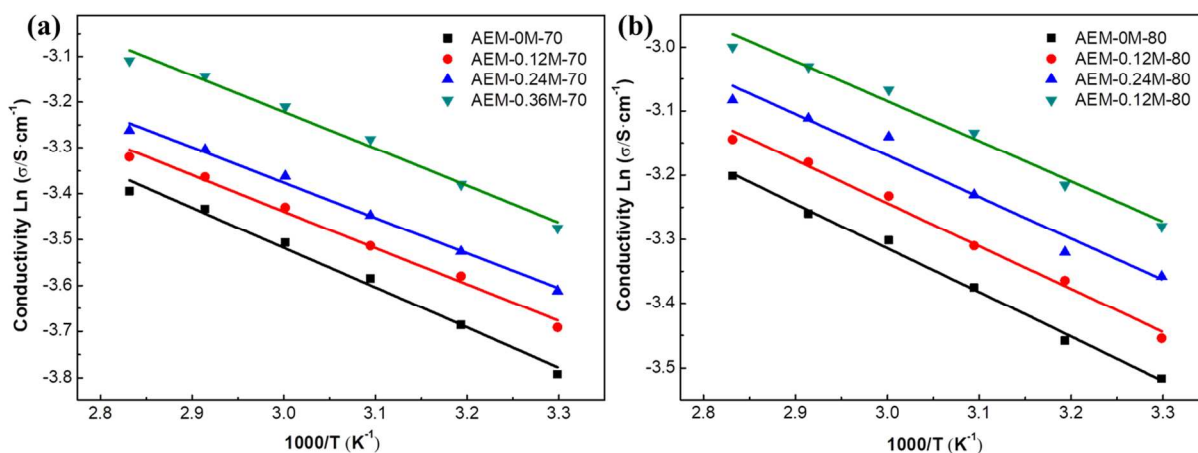

**Figure S9.** Arrhenius plots of ionic conductivities of the membranes in  $\text{OH}^-$  form with different LDH contents: (a) the  $\text{C}_{12}\text{VIMCl}$  content is 70 wt%; (b) the  $\text{C}_{12}\text{VIMCl}$  content is 80 wt%.



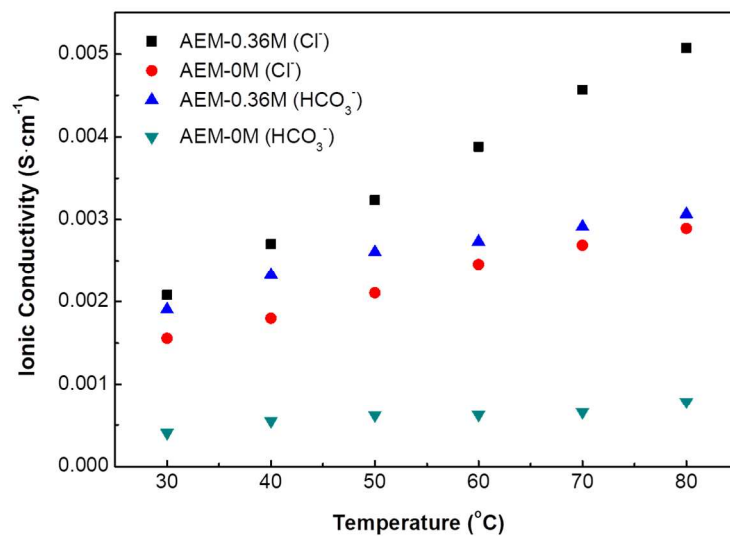

**Figure S10.** The conductivities of membranes obtained by in-phase photopolymerization of C<sub>12</sub>VIMBr in the H<sub>1</sub> phase (70%) in Cl<sup>−</sup> and HCO<sub>3</sub><sup>−</sup> form as a function of temperature.

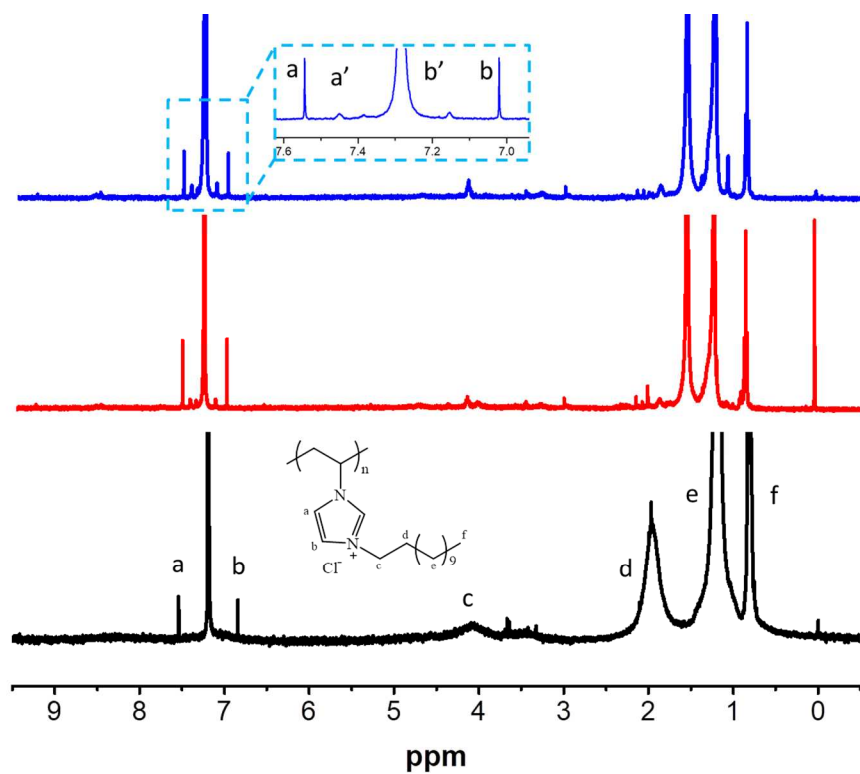

**Figure S11.**  $^1\text{H}$  NMR spectra ( $\text{CDCl}_3$ ) of AEM-0.36M-70 before (black) and after the accelerated alkaline stability test by exposure to 2 M KOH aqueous solution at 80  $^\circ\text{C}$  for 96 h (red) and 120 h (blue).
